# Supplementary material
Source: Springer Nature journal article supplement (https://www.springermedizin.de/resource/supplementary/12916_2012_625_MOESM1_ESM.pdf/9597948)

**A**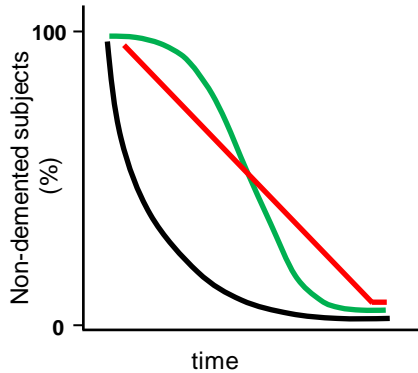**B**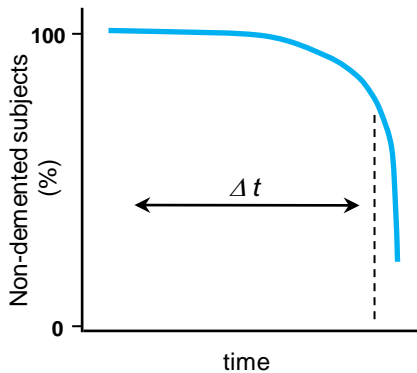**C**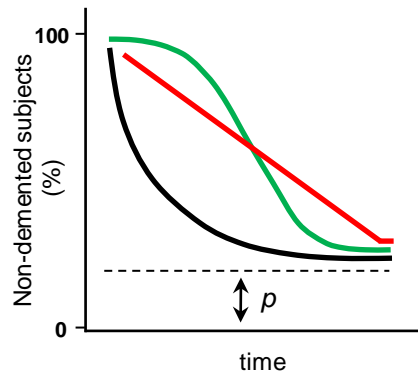

Supplement: MOESM1 [file 9597948]
